# Supplementary material for: Exome sequencing in multiple sclerosis families identifies 12 candidate genes and nominates biological pathways for the genesis of disease
Source: PubMed Central journal article supplement (PMC6553700; doi:10.1371/journal.pgen.1008180), 2019-06-06
Supplement: pgen.1008180.s001.pdf [file pgen.1008180.s001.pdf]

**Table S1 - Clinical phenotype for MS patients harboring variants in nominated MS genes.**

RR, relapsing-remitting MS; PP, primary progressive MS; RR (SP), relapsing-remitting which became secondary progressive; n/a, not available. \*Disease course was determined post hoc from clinical charts.

| Gene and amino acid change | Patient ID | Gender | Age at onset (age at death) | Disease course at MS onset | EDSS (at years after MS onset) |
|----------------------------|------------|--------|-----------------------------|----------------------------|--------------------------------|
| PLAU p.C151F               | II-1       | Female | n/a (52)                    |                            | 10 (n/a)                       |
|                            | II-4       | Male   | 34                          |                            |                                |
|                            | II-5       | Male   | 23 (44)                     | RR*                        | 10 (21)                        |
|                            | II-6       | Female | 36                          | RR                         | 2 (0)                          |
| PLAU p.T86A                | II-1       | Male   | 27                          | PP                         | 6.5 (11)                       |
|                            | II-2       | Female | 17                          | RR                         | 1 (19)                         |
| PLAU p.H149Y               | II-6       | Female | 25                          | PP                         | 8 (25)                         |
|                            | III-2      | Female | 25                          | RR                         | 3.5 (3)                        |
| MASP1 p.G459D              | II-1       | Female | 20                          | RR (SP)                    | 6 (26)                         |
|                            | II-2       | Female | 33                          | RR                         | 3 (28)                         |
|                            | II-3       | Male   | 28                          | RR                         | 3 (34)                         |
|                            | II-5       | Female | 22                          | RR (SP)                    | 4 (22)                         |
|                            | II-8       | Male   | 34                          | RR (SP)                    | 6.5 (35)                       |
| C2 p.T184M                 | III-2      | Female | 31 (47)                     | RR*                        | 10 (16)                        |
|                            | IV-1       | Male   | 31                          | RR                         |                                |
|                            | IV-6       | Female | 38                          | RR                         | 2.5 (7)                        |
|                            | IV-7       | Female |                             | RR (SP)                    | 8 (n/a)                        |
| NLRP12 p.L972H             | II-1       | Male   | 23 (44)                     | PP                         | 3.5 (23)                       |
|                            | II-2       | Female | 25                          | PP                         | 7.5 (19)                       |
|                            | II-4       | Female | 32                          | RR                         | 3.5 (26)                       |
|                            | II-5       | Female | 32                          | RR (SP)                    | 4 (11)                         |
|                            | II-6       | Male   | 35                          |                            |                                |
|                            | II-7       | Female |                             |                            |                                |
| NLRP12 p.L475Q             | II-1       | Male   | 39                          | PP                         | 7.5 (4)                        |
|                            | II-2       | Female | 22                          | RR                         | 0 (14)                         |
| UBR2 p.A1658T              | II-3       | Female | 47                          | PP                         | 8 (16)                         |
|                            | II-7       | Male   | 36                          | RR                         | 6 (17)                         |
|                            | III-2      | Female | 38                          | PP                         | 6 (14)                         |
|                            | III-4      | Male   | 29                          | PP                         | 8 (5)                          |
| CTNNA3 p.A852S             | III-3      | Female | 39                          | RR                         |                                |
|                            | III-6      | Female | 30                          | RR                         |                                |
|                            | III-10     | Female | 25                          | PP                         | 3.5 (25)                       |
|                            | III-11     | Male   | 24                          | RR                         | 1.5 (9)                        |
|                            | III-12     | Female | 15                          | PP                         | 7 (24)                         |
| NFATC2 p.P679L             | III-2      | Female | 23                          | PP                         |                                |
|                            | III-4      | Female | 30                          | PP                         | 6.5 (44)                       |
|                            | III-9      | Female |                             |                            |                                |
|                            | III-10     | Male   |                             |                            |                                |
|                            | IV-3       | Female | 42                          | RR                         | 1.5 (5)                        |
|                            | IV-4       | Female | 37                          | RR                         | 1.5 (1)                        |

**Table S1 - (Continued)**

| <b>Gene and amino acid change</b> | <b>Patient ID</b> | <b>Gender</b> | <b>Age at onset (age at death)</b> | <b>Disease course at MS onset</b> | <b>EDSS (at years after MS onset)</b> |
|-----------------------------------|-------------------|---------------|------------------------------------|-----------------------------------|---------------------------------------|
| RNF213 p.N2327D                   | II-1              | Female        | 37                                 | RR                                | 0 (8)                                 |
|                                   | II-3              | Female        | 30                                 | RR                                | 0 (12)                                |
|                                   | II-5              | Female        | 24 (44)                            | RR (SP)                           | 9 (15)                                |
|                                   | II-6              | Female        | 29                                 | RR                                | 1.5 (3)                               |
|                                   | II-7              | Female        | 36                                 |                                   |                                       |
| NCOA3 p.R485C                     | III-2             | Female        | 23                                 | PP                                |                                       |
|                                   | III-7             | Female        | 37                                 | PP                                |                                       |
|                                   | III-8             | Female        |                                    |                                   |                                       |
|                                   | IV-4              | Female        |                                    |                                   |                                       |
|                                   | II-8              | Female        | 23                                 | PP                                | 8 (43)                                |
|                                   | III-10            | Female        | 25                                 | RR                                | 1.5 (20)                              |
|                                   | II-12             | Female        | 27                                 |                                   |                                       |
|                                   | II-13             | Female        | 32 (56)                            |                                   |                                       |
| KCNG4 p.R474H                     | III-2             | Male          |                                    |                                   |                                       |
|                                   | III-4             | Male          | 25                                 | RR                                | 0 (19)                                |
|                                   | III-9             | Female        | 14 (54)                            | PP                                | 9 (34)                                |
|                                   | IV-1              | Male          | 22                                 | RR                                | 1.5 (3)                               |
|                                   | IV-2              | Female        | 20                                 | RR                                |                                       |
|                                   | IV-3              | Female        | 27                                 | RR                                |                                       |
| KCNG4 p.R365H                     | III-3             | Female        | 49                                 | PP                                | 6 (8)                                 |
|                                   | III-5             | Female        | 37                                 | PP                                | 7 (21)                                |
| SLC24A1 p.L26F                    | II-2              | Male          | 48 (79)                            | PP                                | 8 (19)                                |
|                                   | II-4              | Female        | 41                                 | PP                                | 8 (23)                                |
|                                   | II-9              | Female        | 25                                 | RR*                               |                                       |
|                                   | III-1             | Male          | 25                                 | PP*                               |                                       |
|                                   | III-2             | Male          | 30                                 | RR*                               |                                       |
|                                   | III-3             | Female        | 20                                 | RR                                | 1 (1)                                 |
|                                   | II-10             | Male          | n/a (78)                           |                                   |                                       |
|                                   | III-4             | Female        | 40                                 | RR                                | 2 (14)                                |
|                                   | II-14             | Male          | 25                                 | RR (SP)                           | 2.5 (10)                              |
| SLC8B1 p.S94G                     | III-2             | Male          | 23                                 | RR (SP)                           | 6.5 (32)                              |
|                                   | III-3             | Female        | 22                                 |                                   |                                       |
|                                   | III-5             | Female        | 50                                 |                                   |                                       |
|                                   | III-7             | Female        | 24                                 | RR                                | 6 (22)                                |
| SLC8B1 p.Y564X                    | II-1              | Male          |                                    | PP                                |                                       |
|                                   | III-1             | Female        | 22                                 | RR                                | 1.5 (23)                              |
