# Supplementary material for: Exome sequencing in multiple sclerosis families identifies 12 candidate genes and nominates biological pathways for the genesis of disease
Source: PubMed Central journal article supplement (PMC6553700; doi:10.1371/journal.pgen.1008180), 2019-06-06
Supplement: pgen.1008180.s002.pdf [file pgen.1008180.s002.pdf]

**Table S2 - Non-segregating variants identified in MS patients.**

| Gene   | Chromosome:<br>Genomic<br>position | Reference/<br>Alternative<br>allele | Transcript ID | cDNA<br>change | Amino acid<br>change | dbSNP ID<br>rs/ss number | Population   | Number<br>of<br>families | MS:<br>carriers/<br>total | Healthy:<br>carriers/<br>total* | ExAC<br>(MAF) |
|--------|------------------------------------|-------------------------------------|---------------|----------------|----------------------|--------------------------|--------------|--------------------------|---------------------------|---------------------------------|---------------|
| PLAU   | 10:75671487                        | A/T                                 | NM_002658     | c.412T>A       | p.S138T              | rs776428822              | Italy        | 2                        | 1/5, 1/3                  | -                               | 0.009%        |
| MASP1  | 3:186954337                        | C/T                                 | NM_139125     | c.1322G>A      | p.R441H              | rs141872329              | Canada       | 1                        | 1/2                       | 0/3                             | 0.03%         |
|        | 3:186954275                        | G/T                                 | NM_139125     | c.1384C>A      | p.P462T              | ss2137543902             | Canada       | 1                        | 3/5                       | 1/3                             | n/a           |
|        | 3:186954047                        | G/A                                 | NM_139125     | c.1612C>T      | p.R538X              | rs369868022              | Canada       | 1                        | 1/2                       | 1/1                             | 0.001%        |
| C2     | 6:31911430                         | A/G                                 | NM_000063     | c.1577A>G      | p.K526R              | rs146054348              | Canada       | 1                        | 1/10                      | -                               | 0.02%         |
| NLRP12 | 19:54313859                        | G/A                                 | NM_144687     | c.1054C>T      | p.R352C              | rs199881207              | Italy/Canada | 2                        | 2/4, 1/2                  | 1/2, 1/3                        | 0.04%         |
| UBR2   | 6:42600308                         | G/A                                 | NM_015255     | c.1300G>A      | p.E434K              | rs769174334              | Canada       | 1                        | 2/3                       | 2/6                             | 0.002%        |
|        | 6:42604807                         | G/A                                 | NM_015255     | c.1733G>A      | p.G578D              | rs780141170              | Canada       | 1                        | 1/4                       | 1/3                             | 0.001%        |
|        | 6:42643860                         | G/A                                 | NM_015255     | c.4318G>A      | p.G1440R             | rs371184591              | Canada       | 1                        | 1/2                       | 1/3                             | 0.006%        |
| CTNNA3 | 10:69366752                        | G/A                                 | NM_013266     | c.155C>T       | p.S52L               | rs139105272              | Italy        | 2                        | 1/4, -                    | -, 1/4                          | 0.02%         |
|        | 10:68979412                        | G/A                                 | NM_013266     | c.796C>T       | p.P266S              | rs199985402              | Canada       | 1                        | 1/3                       | 1/2                             | 0.007%        |
|        | 10:68940214                        | C/T                                 | NM_013266     | c.908G>A       | p.R303H              | rs780671006              | Canada       | 1                        | 1/10                      | -                               | 0.002%        |
|        | 10:68526171                        | G/A                                 | NM_013266     | c.1132C>T      | p.R378C              | rs187752783              | Canada       | 2                        | 1/4, 1/10                 | 2/4, -                          | 0.04%         |
|        | 10:68280458                        | T/C                                 | NM_013266     | c.1448A>G      | p.K483R              | rs200282168              | Italy        | 1                        | 1/3                       | -                               | n/a           |
|        | 10:67680203                        | A/G                                 | NM_013266     | c.2573T>C      | p.L858S              | rs41313840               | Canada       | 2                        | 1/2, 1/4                  | 2/4, -                          | 0.03%         |
| NFATC2 | 20:50140514                        | G/T                                 | NM_173091     | c.266C>A       | p.P89Q               | rs556060763              | Italy        | 1                        | 1/4                       | -                               | 0.007%        |
|        | 20:50051820                        | C/T                                 | NM_173091     | c.1937G>A      | p.R646Q              | rs769925564              | Canada       | 1                        | 2/2                       | 5/6                             | 0.005%        |
|        | 20:50049200                        | G/A                                 | NM_173091     | c.2126C>T      | p.P709L              | rs751513686              | Canada       | 1                        | 1/7                       | -                               | 0.002%        |
|        | 20:50049108                        | C/T                                 | NM_173091     | c.2218G>A      | p.A740T              | rs758439316              | Canada       | 1                        | 2/5                       | 2/2                             | 0.004%        |
|        | 20:50049105                        | G/C                                 | NM_173091     | c.2221C>G      | p.R741G              | rs78964722               | Canada       | 1                        | 1/3                       | 1/3                             | 0.02%         |
| RNF213 | 17:78313149                        | C/T                                 | NM_001256071  | c.4982C>T      | p.T1661M             | rs144944826              | Italy        | 1                        | 1/3                       | -                               | 0.01%         |
|        | 17:78317719                        | A/G                                 | NM_001256071  | c.6246A>G      | p.I2082M             | rs778899448              | Canada       | 1                        | 1/2                       | 1/4                             | 0.001%        |
|        | 17:78317763                        | T/C                                 | NM_001256071  | c.6290T>C      | p.V2097A             | rs375665425              | Canada       | 1                        | 1/3                       | 0/3                             | 0.001%        |
|        | 17:78318686                        | A/G                                 | NM_001256071  | c.6551A>G      | p.Q2184R             | rs138595111              | Italy        | 1                        | 1/3                       | -                               | 0.24%         |
|        | 17:78320968                        | C/T                                 | NM_001256071  | c.8833C>T      | p.R2945C             | rs540094757              | Canada       | 1                        | 1/2                       | 1/2                             | 0.06%         |

|             |              |              |              |            |             |              |        |     |          |          |        |
|-------------|--------------|--------------|--------------|------------|-------------|--------------|--------|-----|----------|----------|--------|
| RNF213      | 17:78321229  | G/A          | NM_001256071 | c.9094G>A  | p.G3032R    | rs148408469  | Canada | 1   | 1/5      | 0/5      | 0.001% |
|             | 17:78326787  | A/T          | NM_001256071 | c.10351A>T | p.M3451L    | rs532730964  | Canada | 1   | 1/5      | -        | 0.007% |
|             | 17:78327338  | G/A          | NM_001256071 | c.10450G>A | p.G3484S    | rs140300282  | Canada | 1   | 1/1      | 2/5      | 0.05%  |
|             | 17:78336951  | C/G          | NM_001256071 | c.11405C>G | p.S3802X    | rs757791430  | Canada | 1   | 1/2      | 2/5      | 0.001% |
|             | 17:78341843  | C/T          | NM_001256071 | c.12055C>T | p.R4019C    | rs139265462  | Canada | 2   | 1/4, 2/2 | 0/3, -   | 0.05%  |
|             | 17:78343324  | C/T          | NM_001256071 | c.12178C>T | p.R4060C    | rs144719362  | Canada | 1   | 1/2      | -        | 0.01%  |
|             | 17:78345775  | A/G          | NM_001256071 | c.12527A>G | p.N4176S    | rs527844265  | Italy  | 2   | 1/5, -   | -, 1/2   | 0.01%  |
|             | 17:78353463  | C/T          | NM_001256071 | c.13589C>T | p.A4530V    | rs151100315  | Canada | 1   | 3/6      | -        | 0.01%  |
|             | 17:78359398  | T/C          | NM_001256071 | c.14516T>C | p.L4839P    | ss3646580240 | Canada | 1   | 1/3      | 2/4      | n/a    |
|             | 17:78360130  | C/T          | NM_001256071 | c.14620C>T | p.R4874W    | rs779668238  | Canada | 1   | 1/3      | -        | 0.001% |
| 17:78360187 | G/C          | NM_001256071 | c.14677G>C   | p.E4893Q   | rs143163385 | Canada       | 1      | 2/4 | 1/4      | 0.04%    |        |
| NCOA3       | 20:46262252  | A/G          | NM_181659    | c.836A>G   | p.N279S     | rs756473801  | Canada | 1   | 1/2      | 2/4      | 0.003% |
|             | 20:46265385  | C/T          | NM_181659    | c.2255C>T  | p.S752F     | rs61748368   | Italy  | 2   | 1/5, 1/4 | 1/4, -   | 0.04%  |
|             | 20:46268423  | C/G          | NM_181659    | c.2810C>G  | p.S937C     | rs142951578  | Canada | 1   | 1/2      | -        | 0.05%  |
|             | 20:46268497  | C/T          | NM_181659    | c.2884C>T  | p.P962S     | ss3646580243 | Canada | 1   | 1/2      | 2/5      | n/a    |
|             | 20:46275917  | A/C          | NM_181659    | c.3353A>C  | p.Q1118P    | rs149561356  | Italy  | 2   | 2/5, -   | 1/4, 1/2 | 0.27%  |
|             | 20:46275938  | G/A          | NM_181659    | c.3374G>A  | p.G1125D    | rs144254604  | Canada | 2   | 3/4, 1/2 | 2/5, 1/4 | 0.03%  |
| 20:46279918 | C/T          | NM_181659    | c.3844C>T    | p.P1282S   | rs138733364 | Italy        | 1      | 1/3 | 1/2      | 0.14%    |        |
| KCNG4       | 16:84270469  | C/T          | NM_172347    | c.623G>A   | p.R208H     | rs560844482  | Canada | 1   | 1/6      | -        | 0.001% |
|             | 16:84256355  | C/T          | NM_172347    | c.1028G>A  | p.R343H     | rs377698250  | Canada | 1   | 3/4      | 3/6      | 0.02%  |
| SLC24A1     | 15:65916899  | C/T          | NM_004727    | c.481C>T   | p.Q161X     | rs200047855  | Canada | 1   | 1/7      | -        | 0.003% |
|             | 15:65917553  | A/T          | NM_004727    | c.1135A>T  | p.T379S     | rs374623693  | Canada | 1   | 1/10     | -        | 0.002% |
|             | 15:65918247  | T/G          | NM_004727    | c.1829T>G  | p.V610G     | ss3646580238 | Canada | 1   | 1/3      | 3/8      | n/a    |
|             | 15:65944027  | T/G          | NM_004727    | c.2813T>G  | p.V938G     | rs376493994  | Canada | 1   | 2/4      | 2/4      | 0.001% |
|             | 15:65944981  | T/C          | NM_004727    | c.2885T>C  | p.V962A     | rs751019241  | Canada | 1   | 2/4      | 4/6      | 0.003% |
| SLC8B1      | 12:113758446 | T/C          | NM_024959    | c.466A>G   | p.S156G     | ss3646580237 | Canada | 1   | 2/2      | 3/5      | n/a    |
|             | 12:113754399 | G/A          | NM_024959    | c.925C>T   | p.L309F     | rs758828313  | Canada | 1   | 2/5      | 2/3      | 0.002% |
|             | 12:113753176 | G/A          | NM_024959    | c.1099C>T  | p.P367S     | rs763829480  | Canada | 1   | 1/10     | -        | 0.005% |
|             | 12:113748055 | G/A          | NM_024959    | c.1241C>T  | p.P414L     | ss3646580236 | Italy  | 1   | 2/3      | 1/2      | n/a    |

\*excluding unaffected parents of MS patients
