# Supplementary material for: Exome sequencing in multiple sclerosis families identifies 12 candidate genes and nominates biological pathways for the genesis of disease
Source: PubMed Central journal article supplement (PMC6553700; doi:10.1371/journal.pgen.1008180), 2019-06-06
Supplement: pgen.1008180.s003.pdf [file pgen.1008180.s003.pdf]

**Table S3 - NCOA3 and SLC24A1 disease haplotypes.**

Microsatellite markers are shown with their physical locations (NCBI Build 37.1, hg19). Allele sizes are given in base pairs consistent with Centre d'Etude du Polymorphisme Humain (CEPH) standards, and include CEPH samples 1331-1 and 1331-2 as reference.

a)

| Marker      | Chromosome and position | NCOA3 Family 1 | NCOA3 Family 2 | NCOA3 Family 3 | CEPH 1331-1 | CEPH 1331-2 |
|-------------|-------------------------|----------------|----------------|----------------|-------------|-------------|
| D20S888     | 20:45,183,737           | 159            | 161            | 161            | 155/159     | 147/163     |
| D20S886     | 20:45,251,083           | 151            | 145            | 147            | 145/151     | 147/147     |
| D20S891     | 20:45,929,588           | 216            | 212            | 204            | 212/212     | 204/210     |
| D20S197     | 20:46,160,704           | 191            | 191            | 191            | 191/205     | 187/191     |
| NCOA3 R485C | 20:46,264,406           | T              | T              | T              | C           | C           |
| D20S178     | 20:46,551,927           | 254            | 248            | 248            | 248/250     | 244/254     |
| D20S176     | 20:47,313,442           | 173            | 167            | 173            | 167/185     | 173/173     |
| D20S866     | 20:47,363,334           | 179            | 183            | 173            | 171/173     | 171/173     |
| D20S887     | 20:47,673,170           | 261            | 245            | 245            | 253/255     | 245/245     |

b)

| Marker       | Chromosome and position | SLC24A1 Family 1 | SLC24A1 Family 2 | SLC24A1 Family 3 | CEPH 1331-1 | CEPH 1331-2 |
|--------------|-------------------------|------------------|------------------|------------------|-------------|-------------|
| D15S987      | 15:63,298,398           | 176              | 176              | 182              | 176/177     | 176/176     |
| D15S159      | 15:63,426,872           | 163              | 165              | 163              | 163/169     | 165/165     |
| D15S993      | 15:64,217,748           | 181              | 181              | 187              | 179/183     | 181/183     |
| D15S1507     | 15:65,340,003           | 204              | 208              | 216              | 204/208     | 208/212     |
| SLC24A1 L26F | 15:65,916,494           | T                | T                | T                | C           | C           |
| D15S1020     | 15:65,998,580           | 218              | 218              | 218/227          | 221/227     | 218/221     |
| D15S213      | 15:66,452,868           | 190              | 192              | 190              | 190/192     | 190/192     |
| D15S153      | 15:66,559,862           | 218              | 208              | 208              | 212/218     | 212/218     |
| D15S125      | 15:67,092,827           | 159              | 173              | 173              | 167/169     | 165/165     |
| D15S988      | 15:67,326,520           | 277              | 275              | 263              | 261/267     | 259/261     |
