# Supplementary material for: Exome sequencing in multiple sclerosis families identifies 12 candidate genes and nominates biological pathways for the genesis of disease
Source: PubMed Central journal article supplement (PMC6553700; doi:10.1371/journal.pgen.1008180), 2019-06-06
Supplement: pgen.1008180.s005.pdf [file pgen.1008180.s005.pdf]

**Table S5 - Allele frequencies in Canadian case-control samples for additional variants segregating with disease in MS families.**

| <b>Chromosome</b> | <b>Position (hg19)</b> | <b>Reference</b> | <b>Alternate</b> | <b>MS (MAF)</b> | <b>Control (MAF)</b> |
|-------------------|------------------------|------------------|------------------|-----------------|----------------------|
| 1                 | 1,225,899              | G                | A                | 1.275%          | 1.056%               |
| 1                 | 1,232,004              | G                | A                | 0.528%          | 0.507%               |
| 1                 | 9,656,015              | A                | T                | 0.020%          | 0%                   |
| 1                 | 12,342,990             | G                | A                | 1.037%          | 1.046%               |
| 1                 | 12,835,153             | G                | A                | 0.040%          | 0.047%               |
| 1                 | 60,331,604             | T                | C                | 0.020%          | 0%                   |
| 1                 | 109,824,441            | G                | C                | 0.044%          | 0%                   |
| 1                 | 186,957,518            | G                | A                | 0.111%          | 0.111%               |
| 2                 | 25,966,789             | A                | C                | 0.024%          | 0%                   |
| 2                 | 44,539,792             | T                | C                | 0.366%          | 0.185%               |
| 2                 | 53,943,868             | A                | G                | 0.369%          | 0.252%               |
| 2                 | 109,365,537            | A                | G                | 0.025%          | 0%                   |
| 2                 | 109,546,682            | G                | A                | 0.073%          | 0%                   |
| 2                 | 160,994,593            | T                | C                | 0.024%          | 0%                   |
| 2                 | 163,361,158            | T                | A                | 0.593%          | 0.411%               |
| 2                 | 201,436,400            | G                | T                | 0.020%          | 0%                   |
| 2                 | 210,569,316            | G                | A                | 0.020%          | 0%                   |
| 3                 | 69,239,047             | G                | T                | 0.199%          | 0.169%               |
| 4                 | 100,261,822            | T                | A                | 0.040%          | 0%                   |
| 5                 | 89,979,568             | G                | A                | 0.507%          | 0.358%               |
| 5                 | 100,147,570            | C                | T                | 0.024%          | 0%                   |
| 5                 | 150,901,488            | T                | C                | 0.049%          | 0%                   |
| 5                 | 162,945,202            | A                | G                | 0.020%          | 0%                   |
| 6                 | 20,124,710             | G                | A                | 0.243%          | 0.050%               |
| 6                 | 26,124,044             | C                | T                | 0.020%          | 0%                   |
| 6                 | 26,271,372             | T                | C                | 0.049%          | 0%                   |
| 6                 | 27,925,237             | C                | G                | 0.020%          | 0%                   |
| 6                 | 32,820,000             | C                | A                | 0.573%          | 0.462%               |
| 6                 | 33,143,391             | G                | A                | 0.100%          | 0.047%               |
| 6                 | 35,196,417             | A                | G                | 0.020%          | 0%                   |
| 6                 | 40,999,437             | T                | C                | 0.398%          | 0.508%               |
| 6                 | 42,656,072             | G                | A                | 0.020%          | 0%                   |
| 6                 | 49,814,332             | C                | T                | 0.049%          | 0.061%               |
| 6                 | 109,768,568            | G                | T                | 0.557%          | 0.333%               |
| 6                 | 137,166,790            | A                | C                | 0.534%          | 0.825%               |
| 6                 | 150,157,303            | C                | A                | 0.030%          | 0.059%               |
| 7                 | 47,342,634             | G                | A                | 0.025%          | 0%                   |
| 7                 | 48,626,771             | C                | T                | 0.391%          | 0.366%               |
| 9                 | 131,337,087            | A                | G                | 0.025%          | 0%                   |
| 11                | 397,045                | C                | T                | 0.223%          | 0.050%               |
| 11                | 9,769,601              | G                | C                | 0.020%          | 0%                   |
| 11                | 45,672,298             | C                | T                | 0.024%          | 0%                   |

**Table S5 - (Continued)**

| <b>Chromosome</b> | <b>Position (hg19)</b> | <b>Reference</b> | <b>Alternate</b> | <b>MS (MAF)</b> | <b>Control (MAF)</b> |
|-------------------|------------------------|------------------|------------------|-----------------|----------------------|
| 11                | 62,297,555             | C                | T                | 0.119%          | 0.118%               |
| 11                | 67,223,136             | C                | T                | 0.122%          | 0%                   |
| 11                | 86,055,720             | A                | G                | 0.025%          | 0%                   |
| 14                | 21,458,649             | C                | G                | 1.111%          | 1.346%               |
| 14                | 101,201,147            | G                | A                | 0.040%          | 0%                   |
| 15                | 28,519,518             | A                | G                | 0.020%          | 0.049%               |
| 15                | 43,571,404             | C                | T                | 0.807%          | 0.507%               |
| 16                | 2,229,597              | G                | C                | 0.040%          | 0.049%               |
| 16                | 5,009,353              | G                | A                | 0.020%          | 0%                   |
| 17                | 80,543,936             | C                | T                | 0.628%          | 0.596%               |
| 18                | 10,705,481             | T                | C                | 0.073%          | 0.062%               |
| 18                | 12,794,360             | G                | T                | 0.025%          | 0%                   |
| 18                | 42,531,274             | G                | A                | 0.024%          | 0.062%               |
| 19                | 39,230,735             | C                | T                | 0.072%          | 0.243%               |
| 19                | 39,876,646             | A                | G                | 0.719%          | 1.065%               |
| 19                | 41,117,300             | G                | A                | 1.030%          | 1.055%               |
| 19                | 54,600,361             | C                | T                | 0.071%          | 0%                   |
| 20                | 2,464,183              | C                | T                | 0.024%          | 0.059%               |
| 20                | 23,546,723             | A                | G                | 0.044%          | 0.057%               |
| 20                | 40,053,863             | C                | T                | 0.177%          | 0.113%               |
| 20                | 43,945,472             | C                | G                | 0.044%          | 0.057%               |
| 20                | 45,130,768             | G                | C                | 0.221%          | 0.226%               |
| 22                | 25,124,311             | G                | A                | 0.133%          | 0.056%               |
