# Supplementary material for: Exome sequencing in multiple sclerosis families identifies 12 candidate genes and nominates biological pathways for the genesis of disease
Source: PubMed Central journal article supplement (PMC6553700; doi:10.1371/journal.pgen.1008180), 2019-06-06
Supplement: pgen.1008180.s006.pdf [file pgen.1008180.s006.pdf]

**Fig. S1 - Segregation analysis and conservation for a) MASP1 p.Pro462Thr and b) RNF213 p.Arg4019Cys.**

Males are represented by squares and females by circles, a diagonal line indicates subjects known to be deceased. Black filled symbol, MS; gray filled, unaffected obligate carrier. Heterozygote carriers (M) and wild-type (wt) genotypes are provided. MS patients with inferred genotypes are indicated with an asterisk. Organism and RefSeq accession numbers are provided for orthologs and gene name and RefSeq accession numbers for human paralogs, which were obtained from Ensembl release 91. Evolutionarily conserved positions for nominated pathogenic substitutions are highlighted in black.

a)

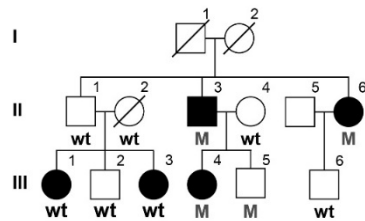

Human NP\_624302.1  
 Mouse NP\_032581.2  
 Rat NP\_071593.1  
 Cow NP\_001070436.1  
 Chicken NP\_998751.1  
 Zebrafish XP\_001341936.1  
 Frog NP\_001090874.1

**P462T**

AEPGLF**P**WQALIV  
 AQKGT**M**PWIAMLS  
 AQKGT**T**PWIAMLS  
 AEPGLF**P**WQALIV  
 AEPGFF**P**WQALIV  
 ASPGLF**P**WQVLLS  
 AEPGFF**P**WQVLIV

MASP1 NP\_624302.1  
 MASP2 NP\_006601.2  
 C1R NP\_001724.4  
 C1S NP\_001725.1  
 C1RL NP\_057630.2  
 F7 NP\_062562.1  
 F9 NP\_001300842.1  
 F10 NP\_000495.1  
 HP NP\_005134.1  
 HPR NP\_066275.3  
 PROC NP\_000303.1  
 PROZ NP\_001243063.1

AEPGLF**P**WQALIV  
 AKPGDF**P**WQVLIL  
 AKMG**N**F**P**WQVFTN  
 ADIK**N**F**P**WQVFFD  
 AKLG**N**F**P**WQAFTS  
 CPKG**E**C**P**WQVLLL  
 AKPG**Q**F**P**WQVVL-  
 CKDG**E**C**P**WQALLI  
 DAKGS**F****P**WQAKMV  
 DAKGS**F****P**WQAKMV  
 TRRG**D**S**P**WQVLL  
 -DLQ**D**L**P**WQVKLT

b)

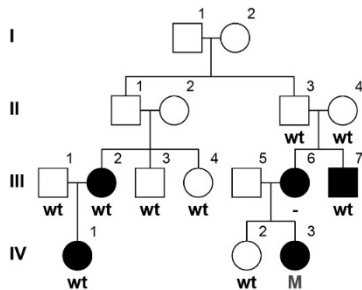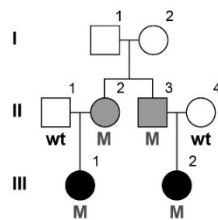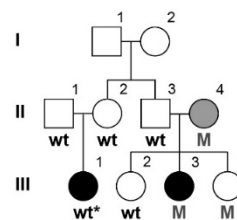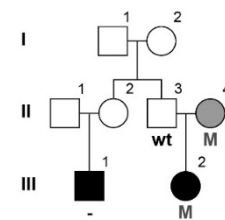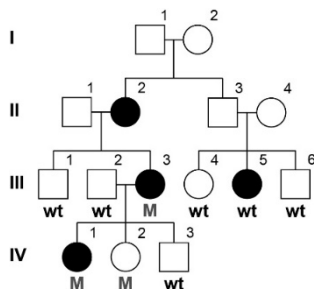

Human NP\_001243000.2  
 Mouse XP\_006534693.1  
 Rat XP\_017453312.1  
 Cow XP\_015323737.1  
 Chicken XP\_004946335.2  
 Zebrafish NP\_001340764.1  
 Frog XP\_017945222.1

**R4019C**

DHVH**C**L**R**CLRAWF  
 DHVY**C**L**R**CIQTWL  
 DHVY**C**L**P**CIQTWL  
 DHV**F****C**L**R**CI**E**VNL  
 NHA**F****C**E**K**CIRAWL  
 DH**I**Y**C**L**T**CIRQWL  
 -----
