# Supplementary material for: Exome sequencing in multiple sclerosis families identifies 12 candidate genes and nominates biological pathways for the genesis of disease
Source: PubMed Central journal article supplement (PMC6553700; doi:10.1371/journal.pgen.1008180), 2019-06-06

**Fig. S2 - NLRP12 inhibition of NF- $\kappa$ B pathways.**

Relative NF- $\kappa$ B promoter activity  $\pm$  standard error for wild-type and mutant NLRP12 constructs is provided; n.s., not significant.

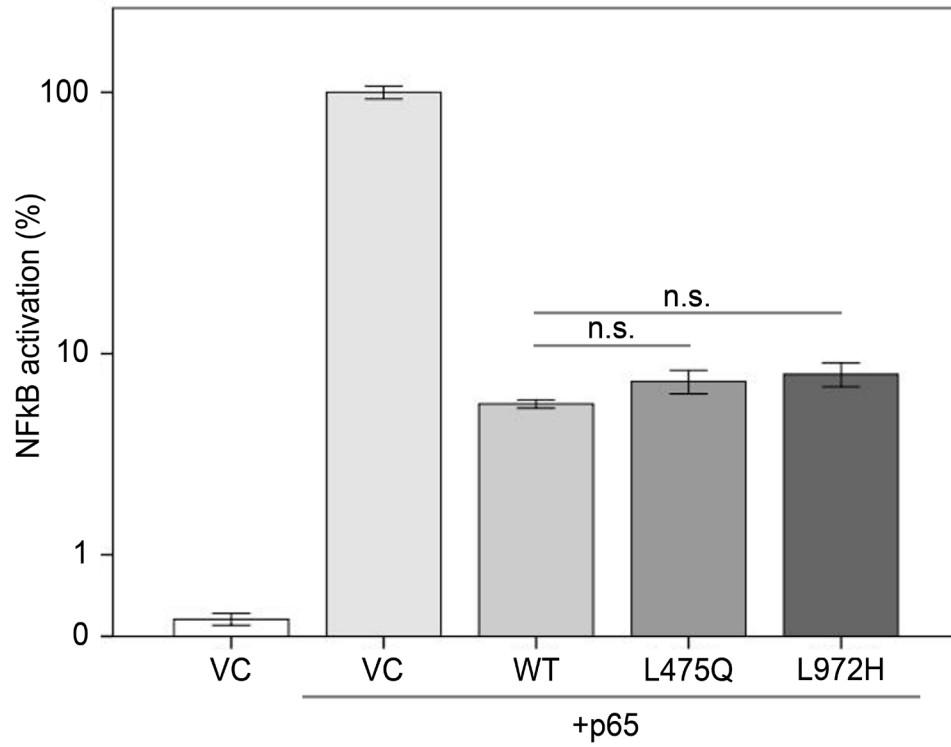

Supplement: pgen.1008180.s007.pdf [file pgen.1008180.s007.pdf]
